# Supplementary material
Source: publisher figshare collection journal article supplement (https://gsajournals.figshare.com/ndownloader/files/13248590)
Supplement: Supplementary file 1 [file 13248590]

TRAY	TREATMENT	LINE	GENERATION	REPLICATE	LINE_REPLICATE	START	ST_START	T_FINISH	DOB	C1_AGE	C1_COUNT	C2_AGE	C2_COUNT	C3_AGE	C3_COUNT	C4_AGE	C4_COUNT	LONGEVITY	LONGEVITY_EXCLUDE	SIZE_AGE	SIZE_SAMEDAY	SIZE	SIZE_EXCLUDE
T1	Control	C002	135	R1	C002-R1	Yes	1	Yes	40	11	13	13	17	18	19	21	17	45	No	10	Yes	2.375	No
T1	Control	C002	135	R2	C002-R2	Yes	0	N/A	N/A	N/A	N/A	N/A	N/A	N/A	N/A	N/A	N/A	N/A	Yes	N/A	N/A	N/A	Yes
T1	Control	C002	135	R3	C002-R3	Yes	1	Yes	40	11	8	14	17	17	23	20	18	44	No	11	No	2.505	No
T1	Control	C002	135	R4	C002-R4	Yes	0	N/A	N/A	N/A	N/A	N/A	N/A	N/A	N/A	N/A	N/A	N/A	Yes	N/A	N/A	N/A	Yes
T1	Control	C002	135	R5	C002-R5	Yes	1	Yes	39	12	9	14	13	18	14	21	20	48	No	12	No	2.452	No
T1	Control	C002	135	R6	C002-R6	Yes	1	Yes	44	10	10	14	24	16	3	17	11	40	No	11	No	2.384	No
T1	Control	C002	135	R7	C002-R7	Yes	1	Yes	39	13	9	15	13	18	19	21	15	45	No	12	No	2.482	No
T1	Copper	C274	134	R1	C274-R1	Yes	1	Yes	44	9	10	12	22	15	9	18	22	44	No	9	No	2.524	No
T1	Copper	C274	134	R2	C274-R2	Yes	1	No	43	12	1	15	2	18	4	N/A	N/A	18	No	10	No	2.36	No
T1	Copper	C274	134	R3	C274-R3	Yes	1	Yes	40	11	12	14	14	17	21	20	21	45	No	12	Yes	2.444	No
T1	Copper	C274	134	R4	C274-R4	Yes	1	Yes	45	11	8	14	18	16	24	20	13	72	No	11	Yes	2.557	No
T1	Copper	C274	134	R5	C274-R5	Yes	1	Yes	43	10	12	13	13	16	22	19	16	45	No	10	No	2.588	No
T1	Copper	C274	134	R6	C274-R6	Yes	1	Yes	43	10	10	13	18	16	17	19	4	51	No	10	No	2.539	No
T1	Copper	C274	134	R7	C274-R7	Yes	0	N/A	N/A	N/A	N/A	N/A	N/A	N/A	N/A	N/A	N/A	N/A	Yes	N/A	N/A	N/A	Yes
T1	Copper	C282	137	R1	C282-R1	Yes	1	Yes	41	12	10	14	22	17	16	20	18	58	No	12	No	2.554	No
T1	Copper	C282	137	R2	C282-R2	Yes	1	Yes	42	11	11	14	18	17	13	19	18	47	No	11	No	2.507	No
T1	Copper	C282	137	R3	C282-R3	Yes	1	Yes	42	11	10	14	28	17	14	20	20	46	No	11	No	2.605	No
T1	Copper	C282	137	R4	C282-R4	Yes	1	Yes	42	11	12	14	21	17	11	20	18	47	No	11	No	2.609	No
T1	Copper	C282	137	R5	C282-R5	Yes	1	Yes	40	11	9	13	18	17	22	20	21	44	No	11	No	2.483	No
T1	Copper	C282	137	R6	C282-R6	Yes	1	Yes	44	9	5	12	8	15	17	18	16	37	No	9	No	2.497	No
T1	Copper	C282	137	R7	C282-R7	Yes	1	Yes	41	12	9	14	16	17	16	20	16	42	No	12	No	2.504	No
T1	CopperNickle	C372	138	R1	C372-R1	Yes	1	Yes	40	11	14	14	16	17	20	20	21	43	No	11	No	2.554	No
T1	CopperNickle	C372	138	R2	C372-R2	Yes	1	Yes	40	11	10	14	17	17	22	20	22	52	No	11	No	2.547	No
T1	CopperNickle	C372	138	R3	C372-R3	Yes	1	Yes	40	11	14	14	15	17	22	20	9	44	No	11	No	2.44	No
T1	CopperNickle	C372	138	R4	C372-R4	Yes	1	Yes	40	11	12	14	23	17	21	20	21	44	No	11	No	2.555	No
T1	CopperNickle	C372	138	R5	C372-R5	Yes	0	N/A	N/A	N/A	N/A	N/A	N/A	N/A	N/A	N/A	N/A	N/A	Yes	N/A	N/A	N/A	Yes
T1	CopperNickle	C372	138	R6	C372-R6	Yes	1	Yes	40	11	11	14	21	17	22	20	22	45	No	11	No	2.6	No
T1	CopperNickle	C372	138	R7	C372-R7	Yes	1	Yes	46	11	10	14	11	17	10	19	20	49	No	15	No	2.558	No
T1	CopperNickle	C380	125	R1	C380-R1	Yes	0	N/A	N/A	N/A	N/A	N/A	N/A	N/A	N/A	N/A	N/A	N/A	Yes	N/A	N/A	N/A	Yes
T1	CopperNickle	C380	125	R2	C380-R2	Yes	0	N/A	N/A	N/A	N/A	N/A	N/A	N/A	N/A	N/A	N/A	N/A	Yes	N/A	N/A	N/A	Yes
T1	CopperNickle	C380	125	R3	C380-R3	Yes	0	N/A	N/A	N/A	N/A	N/A	N/A	N/A	N/A	N/A	N/A	N/A	Yes	N/A	N/A	N/A	Yes
T1	CopperNickle	C380	125	R4	C380-R4	Yes	1	Yes	58	10	2	13	6	16	10	19	9	22	No	12	Yes	2.267	No
T1	CopperNickle	C380	125	R5	C380-R5	Yes	0	N/A	N/A	N/A	N/A	N/A	N/A	N/A	N/A	N/A	N/A	N/A	Yes	N/A	N/A	N/A	Yes
T1	CopperNickle	C380	125	R6	C380-R6	Yes	0	N/A	N/A	N/A	N/A	N/A	N/A	N/A	N/A	N/A	N/A	N/A	Yes	N/A	N/A	N/A	Yes
T1	CopperNickle	C380	125	R7	C380-R7	Yes	0	N/A	N/A	N/A	N/A	N/A	N/A	N/A	N/A	N/A	N/A	N/A	Yes	N/A	N/A	N/A	Yes
T1	Competitive	CC20	N/A	R1	CC20-R1	Yes	1	Yes	42	11	12	14	22	17	13	19	16	45	No	11	No	2.518	No
T1	Competitive	CC20	N/A	R2	CC20-R2	Yes	1	Yes	48	20	14	22	18	26	19	29	14	37	No	N/A	N/A	N/A	Yes
T1	Competitive	CC20	N/A	R3	CC20-R3	Yes	1	Yes	37	12	4	15	13	19	12	21	24	54	No	14	No	2.438	No
T1	Competitive	CC20	N/A	R4	CC20-R4	Yes	1	Yes	43	10	11	14	18	17	18	20	15	49	No	10	No	2.563	No
T1	Competitive	CC20	N/A	R5	CC20-R5	Yes	1	Yes	41	10	8	14	17	17	19	20	18	43	No	11	Yes	2.575	No
T1	Competitive	CC20	N/A	R6	CC20-R6	Yes	1	Yes	48	9	4	12	21	20	20	23	20	31	No	9	No	2.454	No
T1	Competitive	CC20	N/A	R7	CC20-R7	Yes	1	Yes	41	11	5	13	14	16	20	19	10	43	No	11	Yes	2.558	No
T1	Competitive	CC23	N/A	R1	CC23-R1	Yes	1	Yes	37	14	11	17	15	20	17	24	16	55	No	12	No	2.281	No
T1	Competitive	CC23	N/A	R2	CC23-R2	Yes	1	Yes	38	12	5	15	12	18	16	21	11	45	No	13	No	2.412	No
T1	Competitive	CC23	N/A	R3	CC23-R3	Yes	0	N/A	N/A	N/A	N/A	N/A	N/A	N/A	N/A	N/A	N/A	N/A	Yes	N/A	N/A	N/A	Yes
T1	Competitive	CC23	N/A	R4	CC23-R4	Yes	1	Yes	37	15	4	17	10	20	13	23	18	50	No	13	Yes	2.321	No
T1	Competitive	CC23	N/A	R5	CC23-R5	Yes	1	Yes	37	13	8	16	15	19	16	22	17	47	No	13	Yes	2.382	No
T1	Competitive	CC23	N/A	R6	CC23-R6	Yes	1	Yes	46	10	4	13	15	15	15	22	25	27	No	15	No	2.169	No
T1	Competitive	CC23	N/A	R7	CC23-R7	Yes	0	N/A	N/A	N/A	N/A	N/A	N/A	N/A	N/A	N/A	N/A	N/A	Yes	N/A	N/A	N/A	Yes
T2	Control	C003	129	R1	C003-R1	Yes	1	Yes	42	11	12	14	20	17	10	20	22	37	No	15	No	2.535	No
T2	Control	C003	129	R2	C003-R2	Yes	1	Yes	39	12	9	15	16	18	19	21	20	45	No	12	No	2.437	No
T2	Control	C003	129	R3	C003-R3	Yes	1	Yes	37	13	7	16	11	19	21	22	16	51	No	13	Yes	2.429	No
T2	Control	C003	129	R4	C003-R4	Yes	1	Yes	40	11	4	13	16	17	18	20	17	44	No	10	Yes	2.375	No
T2	Control	C003	129	R5	C003-R5	Yes	1	Yes	43	11	1	14	17	17	17	20	14	45	No	11	Yes	2.615	No
T2	Control	C003	129	R6	C003-R6	Yes	1	Yes	40	14	2	16	3	19	7	23	6	53	No	11	No	2.687	No
T2	Control	C003	129	R7	C003-R7	Yes	1	Yes	41	11	6	14	19	17	22	20	19	47	No	12	No	2.419	No
T2	Control	C018	125	R1	C018-R1	Yes	1	Yes	37	15	9	17	2	18	19	21	23	48	No	13	Yes	2.275	No
T2	Control	C018	125	R2	C018-R2	Yes	1	Yes	54	13	22	16	15	20	23	22	14	29	No	13	No	2.662	No
T2	Control	C018	125	R3	C018-R3	Yes	1	Yes	37	13	4	16	11	19	19	22	15	48	No	17	Yes	2.1	No
T2	Control	C018	125	R4	C018-R4	Yes	1	Yes	38	12	6	15	9	18	22	21	8	47	No	12	Yes	2.346	No
T2	Control	C018	125	R5	C018-R5	Yes	0	N/A	N/A	N/A	N/A	N/A	N/A	N/A	N/A	N/A	N/A	N/A	Yes	N/A	N/A	N/A	Yes
T2	Control	C018	125	R6	C018-R6	Yes	1	Yes	39	11	9	14	11	17	22	20	13	48	No	12	No	2.264	No
T2	Control	C018	125	R7	C018-R7	Yes	1	Yes	37	13	5	16	8	19	22	22	15	43	No	13	Yes	2.257	No
T2	Copper	C284	139	R1	C284-R1	Yes	1	Yes	40	11	12	14	20	17	19	20	21	66	No	11	No	2.549	No
T2	Copper	C284	139	R2	C284-R2	Yes	1	Yes	37	13	5	16	10	19	15	22	13	48	No	13	Yes	2.306	No
T2	Copper	C284	139	R3	C284-R3	Yes	1	Yes	37	14	8	17	11	21	24	24	17	55	No	13	Yes	2.345	No
T2	Copper	C284	139	R4	C284-R4	Yes	1	Yes	41	12	5	19	8	22	19	25	24	57	No	12	No	2.522	No
T2	Copper	C284	139	R5	C284-R5	Yes	1	Yes	42	11	10	14	7	17	16	19	15	47	No	11	No	2.455	No
T2	Copper	C284	139	R6	C284-R6	Yes	1	Yes	48	9	3	12	14	15	19	18	14	55	No	9	No	2.364	No
T2	Copper	C284	139	R7	C284-R7	Yes	1	Yes	40	11	11	14	16	18	25	21	17	49	No	11	No	2.609	No
T2	Copper	C299	132	R1	C299-R1	Yes	1	Yes	39	12	6	14	18	18	18	21	18	50	No	15	Yes	2.163	No
T2	Copper	C299	132	R2	C299-R2	Yes	1	Yes	41	11	12	14	20	17	26	20	19	48	No	11	Yes	2.637	No
T2	Copper	C299	132	R3	C299-R3	Yes	1	Yes	41	11	14	14	20	17	23	20	22	41	No	11	Yes	2.537	No
T2	Copper	C299	132	R4	C299-R4	Yes	1	Yes	39	11	9	14	9	17	21	20	11	40	No	11	Yes	2.437	No
T2	Copper	C299	132	R5	C299-R5	Yes	1	Yes	39	11	9	14	13	17	23	20	13	50	No	11	Yes	2.475	No
T2	Copper	C299	132	R6	C299-R6	Yes	1	Yes	37	12	4	14	13	17	17	20	11	48	No	14	No	2.517	No
T2	Copper	C299	132	R7	C299-R7	Yes	1	Yes	39	11	7	14	14	17	22	20	13	49	No	11	Yes	2.472	No
T2	CopperNickle	C358	130	R1	C358-R1	Yes	1	Yes	57	15	7	18	6	21	11	25	5	60	No	12	No	2.392	No
T2	CopperNickle	C358	130	R2	C358-R2	Yes	1	Yes	57	11	1	14	6	17	11	20	10	28	No	11	Yes	2.246	No
T2	CopperNickle	C358	130	R3	C358-R3	Yes	1	Yes	67	14	8	17	4	19	3	21	11	50	No	15	Yes	2.286	No
T2	CopperNickle	C358	130	R4	C358-R4	Yes	1	Yes	60	12	4	15	10	18	7	21	11	48	No	11	No	2.168	No
T2	CopperNickle	C358	130	R5	C358-R5	Yes	0	N/A	N/A	N/A	N/A	N/A	N/A	N/A	N/A	N/A	N/A	N/A	Yes	N/A	N/A	N/A	Yes
T2	CopperNickle	C358	130	R6	C358-R6	Yes	0	N/A	N/A	N/A	N/A	N/A	N/A	N/A	N/A	N/A	N/A	N/A	Yes	N/A	N/A	N/A	Yes
T2	CopperNickle	C358	130	R7	C358-R7	Yes	0	N/A	N/A	N/A	N/A	N/A	N/A	N/A	N/A	N/A	N/A	N/A	Yes	N/A	N/A	N/A	Yes
T2	CopperNickle	C391	134	R1	C391-R1	Yes	1	Yes	40	11	7	14	1	17	17	20	23	45	No	11	No	2.531	No
T2	CopperNickle	C391	134	R2	C391-R2	Yes	1	Yes	41	11	8	15	16	17	22	20	11	43	No	11	Yes	2.623	No
T2	CopperNickle	C391	134	R3	C391-R3	Yes	1	Yes	40	11	16	14	17	17	23	20	13	53	No	11	No	2.598	No
T2	CopperNickle	C391	134	R4	C391-R4	Yes	1	Yes	40	11	12	14	20	17	22	21	16	N/A	Yes	11	No	2.559	No
T2	CopperNickle	C391	134	R5	C391-R5	Yes	1	Yes	39	12	9	15	15	18	16	21	20	46	No	12	No	2.425	No
T2	CopperNickle	C391	134	R6	C391-R6	Yes	1	Yes	46	9	3	12	16	15	15	18	19	43	No	9	No	2.464	No
T2	CopperNickle	C391	134	R7	C391-R7	Yes	1	Yes	44	14	3	16	5	19	4	22	11	41	No	12	Yes	2.041	No
T2	Competitive	CC15	N/A	R1	CC15-R1	Yes	1	Yes	44	9	4	12	16	15	15	18	19	43	No	9	No	2.454	No
T2	Competitive	CC15	N/A	R2	CC15-R2	Yes	1	Yes	44	9	9	12	3	13	15	15	18	41	No	9	No	2.49	No
T2	Competitive	CC15	N/A	R3	CC15-R3	Yes	1	Yes	45	10	7	13	8	16	24	27	8	34	No	10	No	2.52	No
T2	Competitive	CC15	N/A	R4	CC15-R4	Yes	1	Yes	40	11	14	14	15	17	22	21	16	43	No	11	No	2.623	No
T2	Competitive	CC15	N/A	R5	CC15-R5	Yes	1	Yes	40	11	13	14	16	17	18	20	22	77	No	11	No	2.513	No
T2	Competitive	CC15	N/A	R6	CC15-R6	Yes	1	Yes	44	12	4	15	6	18	5	21	7	46	No	10	Yes	2.521	No
T2	Competitive	CC15	N/A	R7	CC15-R7	Yes	1	Yes	40	14	2	16	11	19	14	22	14	48	No	11	No	2.516	No
T3	Control	C006	128	R1	C006-R1	Yes	1	Yes	43	11	10	14	20	17	22	20	21	42	No	11	Yes	2.523	No
T3	Control	C006	128	R2	C006-R2	Yes	1	Yes	40	11	5	14	16	17	17	20	26	42	No	11	No	2.506	No
T3	Control	C006	128	R3	C006-R3	Yes	1	Yes	43	10	7	14	21	17	20	20	14	41	No	10	No	2.614	No
T3	Control	C006	128	R4	C006-R4	Yes	1	Yes	46	11	6	14	12	17	14	20	4	60	No	10	Yes	2.069	No
T3	Control	C006	128	R5	C006-R5	No	N/A	N/A	N/A	N/A	N/A	N/A	N/A	N/A	N/A	N/A	N/A	N/A	Yes	N/A	N/A	N/A	Yes
T3	Control	C006	128	R6	C006-R6	No	N/A	N/A	N/A	N/A	N/A	N/A	N/A	N/A	N/A	N/A	N/A	N/A	Yes	N/A	N/A	N/A	Yes
T3	Control	C006	128	R7	C006-R7	No	N/A	N/A	N/A	N/A	N/A	N/A	N/A	N/A	N/A	N/A	N/A	N/A	Yes	N/A	N/A	N/A	Yes
T3	Copper	C251	139	R1	C251-R1	Yes	1	Yes	53	14	18	17	18	20	12	23	23	49	No	14	No	2.69	No
T3	Copper	C251	139	R2	C251-R2	Yes	1	Yes	46	9	2	12	18	15	23	18	17	42	No	9	No	2.466	No
T3	Copper	C251	139	R3	C251-R3	No	N/A	N/A	N/A	N/A	N/A	N/A	N/A	N/A	N/A	N/A	N/A	N/A	Yes	N/A	N/A	N/A	Yes
T3	Copper	C251	139	R4	C251-R4	No	N/A	N/A	N/A	N/A	N/A	N/A	N/A	N/A	N/A	N/A	N/A	N/A	Yes	N/A	N/A	N/A	Yes
T3	Copper	C251	139	R5	C251-R5	No	N/A	N/A	N/A	N/A	N/A	N/A	N/A	N/A	N/A	N/A	N/A	N/A	Yes	N/A	N/A	N/A	Yes
T3	Copper	C251	139	R6	C251-R6	No	N/A	N/A	N/A	N/A	N/A	N/A	N/A	N/A	N/A	N/A	N/A	N/A	Yes	N/A	N/A	N/A	Yes
T3	Copper	C251	139	R7	C251-R7	No	N/A	N/A	N/A	N/A	N/A	N/A	N/A	N/A	N/A	N/A	N/A	N/A	Yes	N/A	N/A	N/A	Yes
T3	Copper	C254	141	R1	C254-R1	Yes	1	Yes	41	11	13	14	18	17	25	20	15	38	No	11	Yes	2.584	No
T3	Copper	C254	141	R2	C254-R2	Yes	1	Yes	42	10	6	13	15	16	25	19	22	46	No	11	No	2.502	No
T3	Copper	C254	141	R3	C254-R3	Yes	1	Yes	38	12	5	15	13	18	14	21	16	41	No	13	No	2.311	No
T3	Copper	C254	141	R4	C254-R4	Yes	1	Yes	40	11	13	14	19	17	17	20	22	45	No	11	No	2.535	No
T3	Copper	C254	141	R5	C254-R5	Yes	1	Yes	40	11	14	14	23	17	20	20	20	45	No	11	No	2.573	No
T3	Copper	C254	141	R6	C254-R6	Yes	0	N/A	N/A	N/A	N/A	N/A	N/A	N/A	N/A	N/A	N/A	N/A	Yes	N/A	N/A	N/A	Yes
T3	Copper	C254	141	R7	C254-R7	Yes	0	N/A	N/A	N/A	N/A	N/A	N/A	N/A	N/A	N/A	N/A	N/A	Yes	N/A	N/A	N/A	Yes
T3	CopperNickle	C378	136	R8	C378-R8	Yes	1	Yes	40	11	11	14	18	17	22	20	23	44	No	11	No	2.51	No
T3	CopperNickle	C378	136	R2	C378-R2	Yes	1	Yes	40	11	16	14	23	17	18	20	20	45	No	11	No	2.55	No
T3	CopperNickle	C378	136	R3	C378-R3	Yes	1	Yes	41	11	10	14	19	17	21	20	21	39	No	11	Yes	2.584	No
T3	CopperNickle	C378	136	R4	C378-R4	Yes	1	Yes	43	10	9	13	20	16	13	19	20	41	No	10	No	2.515	No
T3	CopperNickle	C378	136	R5	C378-R5	Yes	1	Yes	42	11	8	14	18	17	17	19	19	N/A	Yes	11	No	2.593	No
T3	CopperNickle	C378	136	R6	C378-R6	Yes	1	Yes	41	11	10	14	2	17	26	20	22	44	No	11	Yes	2.552	No
T3	CopperNickle	C378	136	R7	C378-R7	Yes	0	N/A	N/A	N/A	N/A	N/A	N/A	N/A	N/A	N/A	N/A	N/A	Yes	N/A	N/A	N/A	Yes
T3	Competitive	CC14	N/A	R1	CC14-R1	Yes	1	Yes	38	12	8	15	25	18	17	21	15	51	No	13	No	2.386	No
T3	Competitive	CC14	N/A	R2	CC14-R2	Yes	1	Yes	41	12	10	14	18	17	19	20	17	44	No	11	Yes	2.535	No
T3	Competitive	CC14	N/A	R3	CC14-R3	Yes	1	Yes	40	11	10	14	22	18	23	21	21	49	No	11	No	2.575	No
T3	Competitive	CC14	N/A	R4	CC14-R4	Yes	1	Yes	39	11	11	14	20	18	19	21	15	78	No	11	Yes	2.499	No
T3	Competitive	CC14	N/A	R5	CC14-R5	Yes	1	Yes	42	11	10	14	19	17	16	19	17	42	No	11	No	2.486	No
T3	Competitive	CC14	N/A	R6	CC14-R6	Yes	1	Yes	39	11	7	14	15	17	17	20	15	52	No	11	Yes	2.528	No
T3	Competitive	CC14	N/A	R7	CC14-R7	Yes	1	Yes	40	11	11	14	4	18	18	21	20	46	No	11	No	2.558	No
T3	Competitive	CC22	N/A	R1	CC22-R1	Yes	1	Yes	36	10	3	13	10	16	14	19	10	49	No	11	No	2.508	No
T3	Competitive	CC22	N/A	R2	CC22-R2	Yes	1	Yes	42	11	11	14	N/A	17	16	19	19	44	No	11	No	2.615	No
T3	Competitive	CC22	N/A	R3	CC22-R3	Yes	1	Yes	45	10	5	13	22	16	22	19	19	40	No	10	No	2.538	No
T3	Competitive	CC22	N/A	R4	CC22-R4	Yes	1	Yes	38	12	9	15	15	18	21	21	16	44	No	12	Yes	2.408	No
T3	Competitive	CC22	N/A	R5	CC22-R5	Yes	1	Yes	36	10	3	13	9	16	13	18	13	48	No	10	Yes	2.309	No
T3	Competitive	CC22	N/A	R6	CC22-R6	Yes	1	Yes	39	12	6	19	14	22	24	25	19	45	No	11	Yes	2.451	No
T3	Competitive	CC22	N/A	R7	CC22-R7	Yes	1	Yes	37	12	7	15	13	18	20	21	22	47	No	13	Yes	2.287	No
T4	Control	C012	128	R1	C012-R1	Yes	1	Yes	44	12	5	14	12	17	7	19	14	43	No	11	No	2.203	No
T4	Control	C012	128	R2	C012-R2	Yes	1	Yes	46	7	10	10	25	13	12	16	12	38	No	12	Yes	1.964	No
T4	Control	C012	128	R3	C012-R3	Yes	1	Yes	60	10	4	14	13	15	17	19	8	31	No	10	Yes	2.335	No
T4	Control	C012	128	R4	C012-R4	Yes	1	Yes	49	12	1	15	3	17	14	21	19	25	No	11	Yes	2.273	No
T4	Control	C012	128	R5	C012-R5	Yes	1	Yes	42	19	10	22	N/A	26	11	28	8	43	No	12	Yes	2.117	No
T4	Control	C012	128	R6	C012-R6	Yes	1	Yes	47	16	4	19	12	22	8	25	17	43	No	14	No	2.177	No
T4	Control	C012	128	R7	C012-R7	Yes	1	Yes	48	13	6	16	7	19	5	22	15	58	No	14	Yes	2.118	No
T4	Control	C013	137	R1	C013-R1	Yes	1	Yes	42	11	14	14	22	17	10	20	10	43	No	11	No	2.596	No
T4	Control	C013	137	R2	C013-R2	Yes	1	No	41	10	7	13	19	17	23	N/A	N/A	19	No	11	Yes	2.588	No
T4	Control	C013	137	R3	C013-R3	Yes	0	N/A	N/A	N/A	N/A	N/A	N/A	N/A	N/A	N/A	N/A	N/A	Yes	N/A	N/A	N/A	Yes
T4	Control	C013	137	R4	C013-R4	Yes	1	Yes	42	11	11	14	22	17	16	20	21	41	No	11	No	2.614	No
T4	Control	C013	137	R5	C013-R5	Yes	1	Yes	42	11	8	14	24	17	17	20	20	43	No	15	No	2.13	No
T4	Control	C013	137	R6	C013-R6	Yes	1	Yes	42	11	7	14	19	17	16	20	17	40	No	11	No	2.515	No
T4	Control	C013	137	R7	C013-R7	No	N/A	N/A	N/A	N/A	N/A	N/A	N/A	N/A	N/A	N/A	N/A	N/A	Yes	N/A	N/A	N/A	Yes
T4	Copper	C256	138	R1	C256-R1	Yes	1	Yes	59	10	5	13	14	16	21	19	10	22	No	11	Yes	2.467	No
T4	Copper	C256	138	R2	C256-R2	Yes	1	Yes	58	9	4	12	12	15	16	18	17	34	No	10	Yes	2.298	No
T4	Copper	C256	138	R3	C256-R3	No	N/A	N/A	N/A	N/A	N/A	N/A	N/A	N/A	N/A	N/A	N/A	N/A	Yes	N/A	N/A	N/A	Yes
T4	Copper	C256	138	R4	C256-R4	No	N/A	N/A	N/A	N/A	N/A	N/A	N/A	N/A	N/A	N/A	N/A	N/A	Yes	N/A	N/A	N/A	Yes
T4	Copper	C256	138	R5	C256-R5	No	N/A	N/A	N/A	N/A	N/A	N/A	N/A	N/A	N/A	N/A	N/A	N/A	Yes	N/A	N/A	N/A	Yes
T4	Copper	C256	138	R6	C256-R6	No	N/A	N/A	N/A	N/A	N/A	N/A	N/A	N/A	N/A	N/A	N/A	N/A	Yes	N/A	N/A	N/A	Yes
T4	Copper	C256	138	R7	C256-R7	No	N/A	N/A	N/A	N/A	N/A	N/A	N/A	N/A	N/A	N/A	N/A	N/A	Yes	N/A	N/A	N/A	Yes
T4	Copper	C300	131	R1	C300-R1	Yes	1	Yes	47	11	5	14	15	17	19	20	14	37	No	14	No	2.571	No
T4	Copper	C300	131	R2	C300-R2	Yes	1	Yes	44	10	2	13	21	16	25	19	14	45	No	10	Yes	2.438	No
T4	Copper	C300	131	R3	C300-R3	Yes	1	Yes	49	11	13	14	12	17	23	20	11	69	No	11	Yes	2.535	No
T4	Copper	C300	131	R4	C300-R4	Yes	1	Yes	47	11	5	14	19	17	19	20	14	37	No	11	Yes	2.49	No
T4	Copper	C300	131	R5	C300-R5	Yes	1	Yes	52	14	3	18	3	23	2	28	1	38	No	N/A	N/A	N/A	Yes
T4	Copper	C300	131	R6	C300-R6	Yes	N/A	N/A	N/A	N/A	N/A	N/A	N/A	N/A	N/A	N/A	N/A	N/A	Yes	N/A	N/A	N/A	Yes
T4	Copper	C300	131	R7	C300-R7	Yes	1	Yes	48	10	3	12	11	15	17	18	19	40	No	9	No	2.194	No
T4	CopperNickle	C352	127	R1	C352-R1	Yes	0	N/A	N/A	N/A	N/A	N/A	N/A	N/A	N/A	N/A	N/A	N/A	Yes	N/A	N/A	N/A	Yes
T4	CopperNickle	C352	127	R2	C352-R2	Yes	1	Yes	51	21	6	24	16	27	9	30	13	41	No	14	No	2.132	No
T4	CopperNickle	C352	127	R3	C352-R3	Yes	1	Yes	45	12	3	15	3	17	7	21	8	72	No	12	No	2.178	No
T4	CopperNickle	C352	127	R4	C352-R4	Yes	1	Yes	52	14	4	17	3	20	17	22	13	54	No	N/A	N/A	N/A	Yes
T4	CopperNickle	C352	127	R5	C352-R5	Yes	1	Yes	47	14	7	17	11	20	9	23	10	54	No	15	Yes	2.167	No
T4	CopperNickle	C352	127	R6	C352-R6	Yes	0	N/A	N/A	N/A	N/A	N/A	N/A	N/A	N/A	N/A	N/A	N/A	Yes	N/A	N/A	N/A	Yes
T4	CopperNickle	C352	127	R7	C352-R7	Yes	1	Yes	46	11	10	14	10	17	14	20	15	44	No	10	Yes	2.048	No
T4	Competitive	CC16	N/A	R1	CC16-R1	Yes	0	N/A	N/A	N/A	N/A	N/A	N/A	N/A	N/A	N/A	N/A	N/A	Yes	N/A	N/A	N/A	Yes
T4	Competitive	CC16	N/A	R2	CC16-R2	Yes	1	Yes	38	12	6	15	13	21	18	24	25	46	No	12	Yes	2.392	No
T4	Competitive	CC16	N/A	R3	CC16-R3	Yes	1	Yes	43	10	8	14	20	17	15	20	20	45	No	10	No	2.559	No
T4	Competitive	CC16	N/A	R4	CC16-R4	Yes	1	Yes	38	12	7	15	14	18	16	21	10	52	No	12	Yes	2.346	No
T4	Competitive	CC16	N/A	R5	CC16-R5	Yes	1	Yes	38	12	9	15	15	18	17	21	19	42	No	12	Yes	2.368	No
T4	Competitive	CC16	N/A	R6	CC16-R6	Yes	1	Yes	36	10	4	13	10	16	16	19	12	52	No	10	Yes	2.491	No
T4	Competitive	CC16	N/A	R7	CC16-R7	Yes	1	Yes	38	12	1	13	7	15	15	19	17	45	No	12	Yes	2.433	No
T4	Competitive	CC19	N/A	R1	CC19-R1	Yes	1	Yes	43	11	12	14	19	17	19	20	24	42	No	11	Yes	2.564	No
T4	Competitive	CC19	N/A	R2	CC19-R2	Yes	1	Yes	38	12	9	15	15	18	16	21	23	55	No	12	Yes	2.367	No
T4	Competitive	CC19	N/A	R3	CC19-R3	Yes	1	Yes	36	11	4	15	14	17	14	21	15	52	No	15	No	2.694	No
T4	Competitive	CC19	N/A	R4	CC19-R4	Yes	1	Yes	38	12	7	15	11	18	14	21	17	53	No	13	No	2.462	No
T4	Competitive	CC19	N/A	R5	CC19-R5	Yes	1	Yes	37	13	6	16	12	19	14	22	13	46	No	13	Yes	2.312	No
T4	Competitive	CC19	N/A	R6	CC19-R6	Yes	1	Yes	48	10	7	12	19	15	26	18	14	N/A	Yes	9	No	2.462	No
T4	Competitive	CC19	N/A	R7	CC19-R7	Yes	1	Yes	46	9	9	12	20	15	22	18	18	32	No	9	No	2.446	No
T5	Control	C027	99	R1	C027-R1	Yes	1	Yes	48	10	2	16	3	19	17	22	13	40	No	11	No	2.389	No
T5	Control	C027	99	R2	C027-R2	Yes	1	Yes	54	13	8	16	11	21	23	25	10	64	No	14	Yes	2.325	No
T5	Control	C027	99	R3	C027-R3	Yes	0	N/A	N/A	N/A	N/A	N/A	N/A	N/A	N/A	N/A	N/A	N/A	Yes	N/A	N/A	N/A	Yes
T5	Control	C027	99	R4	C027-R4	Yes	0	N/A	N/A	N/A	N/A	N/A	N/A	N/A	N/A	N/A	N/A	N/A	Yes	N/A	N/A	N/A	Yes
T5	Control	C027	99	R5	C027-R5	Yes	1	No	49	15	N/A	N/A	N/A	N/A	N/A	N/A	N/A	15	No	15	Yes	2.524	No
T5	Control	C027	99	R6	C027-R6	Yes	1	Yes	45	11	5	14	8	17	18	20	15	30	No	11	Yes	2.358	No
T5	Control	C027	99	R7	C027-R7	Yes	0	N/A	N/A	N/A	N/A	N/A	N/A	N/A	N/A	N/A	N/A	N/A	Yes	N/A	N/A	N/A	Yes
T5	Control	C038	134	R1	C038-R1	Yes	1	Yes	39	12	6	15	13	18	20	21	19	65	No	12	No	2.468	No
T5	Control	C038	134	R2	C038-R2	Yes	1	Yes	39	12	7	14	11	18	17	21	16	45	No	12	No	2.405	No
T5	Control	C038	134	R3	C038-R3	Yes	1	Yes	36	10	3	13	7	16	15	19	18	47	No	10	Yes	2.275	No
T5	Control	C038	134	R4	C038-R4	Yes	1	Yes	39	11	11	14	12	18	18	21	17	61	No	12	No	2.373	No
T5	Control	C038	134	R5	C038-R5	Yes	1	Yes	37	16	8	19	16	22	15	25	16	54	No	13	Yes	2.168	No
T5	Control	C038	134	R6	C038-R6	Yes	1	Yes	37	13	5	16	11	19	18	23	14	47	No	14	No	2.564	No
T5	Control	C038	134	R7	C038-R7	Yes	1	Yes	45	11	8	14	13	16	21	20	13	40	No	11	Yes	2.562	No
T5	Copper	C281	138	R1	C281-R1	Yes	0	N/A	N/A	N/A	N/A	N/A	N/A	N/A	N/A	N/A	N/A	N/A	Yes	N/A	N/A	N/A	Yes
T5	Copper	C281	138	R2	C281-R2	Yes	0	N/A	N/A	N/A	N/A	N/A	N/A	N/A	N/A	N/A	N/A	N/A	Yes	N/A	N/A	N/A	Yes
T5	Copper	C281	138	R3	C281-R3	Yes	0	N/A	N/A	N/A	N/A	N/A	N/A	N/A	N/A	N/A	N/A	N/A	Yes	N/A	N/A	N/A	Yes
T5	Copper	C281	138	R4	C281-R4	Yes	1	Yes	51	15	2	18	11	21	14	24	12	53	No	18	No	2.524	No
T5	Copper	C281	138	R5	C281-R5	Yes	0	N/A	N/A	N/A	N/A	N/A	N/A	N/A	N/A	N/A	N/A	N/A	Yes	N/A	N/A	N/A	Yes
T5	Copper	C281	138	R6	C281-R6	Yes	0	N/A	N/A	N/A	N/A	N/A	N/A	N/A	N/A	N/A	N/A	N/A	Yes	N/A	N/A	N/A	Yes
T5	Copper	C281	138	R7	C281-R7	Yes	1	Yes	56	12	4	14	9	17	21	20	20	24	No	14	Yes	2.508	No
T5	CopperNickle	C374	134	R1	C374-R1	Yes	1	Yes	40	10	4	13	15	16	20	19	15	45	No	11	No	2.576	No
T5	CopperNickle	C374	134	R2	C374-R2	Yes	1	Yes	40	11	14	14	17	18	21	21	16	42	No	11	No	2.489	No
T5	CopperNickle	C374	134	R3	C374-R3	Yes	1	Yes	40	11	12	17	21	20	20	24	21	53	No	11	No	2.447	No
T5	CopperNickle	C374	134	R4	C374-R4	Yes	1	Yes	41	11	12	14	18	17	20	20	16	43	No	11	Yes	2.569	No
T5	CopperNickle	C374	134	R5	C374-R5	Yes	1	Yes	51	14	3	17	22	20	21	23	21	38	No	10	No	2.457	No
T5	CopperNickle	C374	134	R6	C374-R6	Yes	1	Yes	40	11	14	14	17	18	21	21	20	43	No	N/A	N/A	N/A	Yes
T5	CopperNickle	C374	134	R7	C374-R7	Yes	1	Yes	40	11	13	14	21	17	19	21	18	42	No	11	No	2.49	No
T5	CopperNickle	C399	130	R1	C399-R1	Yes	1	Yes	40	11	10	14	23	17	19	20	20	47	No	11	No	2.521	No
T5	CopperNickle	C399	130	R2	C399-R2	Yes	1	Yes	40	11	3	14	20	17	20	20	20	44	No	11	No	2.569	No
T5	CopperNickle	C399	130	R3	C399-R3	Yes	1	Yes	39	12	9	14	16	18	16	21	18	48	No	12	No	2.428	No
T5	CopperNickle	C399	130	R4	C399-R4	Yes	1	Yes	40	11	10	14	20	17	24	21	17	48	No	11	No	2.53	No
T5	CopperNickle	C399	130	R5	C399-R5	Yes	0	N/A	N/A	N/A	N/A	N/A	N/A	N/A	N/A	N/A	N/A	N/A	Yes	N/A	N/A	N/A	Yes
T5	CopperNickle	C399	130	R6	C399-R6	Yes	1	Yes	42	11	10	17	13	20	9	23	17	36	No	11	No	2.567	No
T5	CopperNickle	C399	130	R7	C399-R7	Yes	1	Yes	39	12	12	15	18	18	19	21	14	48	No	12	No	2.486	No
T5	Competitive	CC17	N/A	R1	CC17-R1	Yes	1	Yes	44	14	24	17	17	20	17	23	13	39	No	10	Yes	2.468	No
T5	Competitive	CC17	N/A	R2	CC17-R2	Yes	0	N/A	N/A	N/A	N/A	N/A	N/A	N/A	N/A	N/A	N/A	N/A	Yes	N/A	N/A	N/A	Yes
T5	Competitive	CC17	N/A	R3	CC17-R3	Yes	1	Yes	44	10	8	14	20	17	17	20	13	44	No	10	Yes	2.515	No
T5	Competitive	CC17	N/A	R4	CC17-R4	Yes	1	Yes	53	13	15	17	13	19	13	20	8	45	No	13	Yes	2.578	No
T5	Competitive	CC17	N/A	R5	CC17-R5	Yes	1	Yes	40	11	12	14	21	18	20	24	19	47	No	11	No	2.542	No
T5	Competitive	CC17	N/A	R6	CC17-R6	Yes	1	Yes	41	11	11	14	19	17	17	20	19	37	No	11	Yes	2.332	No
T5	Competitive	CC17	N/A	R7	CC17-R7	Yes	1	Yes	42	11	10	14	18	17	13	20	13	44	No	11	No	2.547	No
T5	Competitive	CC21	N/A	R1	CC21-R1	Yes	1	Yes	40	11	11	14	12	17	20	21	23	44	No	11	No	2.545	No
T5	Competitive	CC21	N/A	R2	CC21-R2	Yes	1	Yes	40	11	12	14	16	18	21	21	15	46	No	12	Yes	2.461	No
T5	Competitive	CC21	N/A	R3	CC21-R3	Yes	1	Yes	40	11	12	14	21	17	23	21	21	54	No	12	Yes	2.514	No
T5	Competitive	CC21	N/A	R4	CC21-R4	Yes	1	No	53	14	20	17	23	N/A	N/A	N/A	N/A	18	No	14	No	2.55	No
T5	Competitive	CC21	N/A	R5	CC21-R5	Yes	1	Yes	37	13	6	16	21	19	18	22	11	51	No	13	Yes	2.378	No
T5	Competitive	CC21	N/A	R6	CC21-R6	Yes	1	Yes	40	11	13	14	18	17	21	21	19	62	No	10	Yes	2.335	No
T5	Competitive	CC21	N/A	R7	CC21-R7	Yes	1	Yes	42	11	16	15	20	18	17	21	8	43	No	11	No	2.591	No
T6	Control	C024	120	R1	C024-R1	Yes	1	Yes	40	11	13	14	15	17	20	21	22	45	No	11	No	2.62	No
T6	Control	C024	120	R2	C024-R2	Yes	1	Yes	43	10	10	13	2	14	15	17	13	44	No	10	No	2.604	No
T6	Control	C024	120	R3	C024-R3	Yes	1	Yes	39	11	8	12	14	14	13	18	18	50	No	12	No	2.258	No
T6	Control	C024	120	R4	C024-R4	Yes	1	Yes	40	11	N/A	14	15	18	24	21	20	43	No	11	No	2.535	No
T6	Control	C024	120	R5	C024-R5	Yes	1	Yes	40	11	14	14	21	18	21	21	18	42	No	11	No	2.533	No
T6	Control	C024	120	R6	C024-R6	Yes	1	Yes	40	11	10	14	20	18	22	21	19	47	No	10	Yes	2.391	No
T6	Control	C024	120	R7	C024-R7	Yes	1	Yes	40	10	7	13	8	16	20	19	14	40	No	11	No	2.553	No
T6	Control	C037	132	R1	C037-R1	Yes	1	No	40	N/A	N/A	N/A	N/A	N/A	N/A	N/A	N/A	20	No	10	Yes	2.331	No
T6	Control	C037	132	R2	C037-R2	Yes	1	Yes	40	10	4	13	9	16	22	19	14	45	No	10	Yes	2.331	No
T6	Control	C037	132	R3	C037-R3	Yes	0	N/A	N/A	N/A	N/A	N/A	N/A	N/A	N/A	N/A	N/A	N/A	Yes	N/A	N/A	N/A	Yes
T6	Control	C037	132	R4	C037-R4	Yes	1	Yes	42	9	8	12	16	15	24	18	20	40	No	11	No	2.652	No
T6	Control	C037	132	R5	C037-R5	Yes	1	Yes	42	11	9	14	22	17	17	19	20	44	No	9	No	2.432	No
T6	Control	C037	132	R6	C037-R6	Yes	1	Yes	40	10	3	13	10	16	19	19	13	45	No	10	Yes	2.204	No
T6	Control	C037	132	R7	C037-R7	Yes	1	Yes	40	10	6	13	11	16	17	19	11	47	No	11	No	2.558	No
T6	Copper	C291	128	R1	C291-R1	Yes	0	N/A	N/A	N/A	N/A	N/A	N/A	N/A	N/A	N/A	N/A	N/A	Yes	N/A	N/A	N/A	Yes
T6	Copper	C291	128	R2	C291-R2	Yes	1	Yes	50	16	2	18	10	21	10	24	10	36	No	11	No	2.219	No
T6	Copper	C291	128	R3	C291-R3	Yes	0	N/A	N/A	N/A	N/A	N/A	N/A	N/A	N/A	N/A	N/A	N/A	Yes	N/A	N/A	N/A	Yes
T6	Copper	C291	128	R4	C291-R4	Yes	0	N/A	N/A	N/A	N/A	N/A	N/A	N/A	N/A	N/A	N/A	N/A	Yes	N/A	N/A	N/A	Yes
T6	Copper	C291	128	R5	C291-R5	Yes	1	Yes	62	11	4	14	7	17	13	20	13	37	No	N/A	N/A	N/A	Yes
T6	Copper	C291	128	R6	C291-R6	Yes	0	N/A	N/A	N/A	N/A	N/A	N/A	N/A	N/A	N/A	N/A	N/A	Yes	N/A	N/A	N/A	Yes
T6	Copper	C291	128	R7	C291-R7	Yes	0	N/A	N/A	N/A	N/A	N/A	N/A	N/A	N/A	N/A	N/A	N/A	Yes	N/A	N/A	N/A	Yes
T6	CopperNickle	C355	134	R1	C355-R1	Yes	0	N/A	N/A	N/A	N/A	N/A	N/A	N/A	N/A	N/A	N/A	N/A	Yes	N/A	N/A	N/A	Yes
T6	CopperNickle	C355	134	R2	C355-R2	Yes	1	No	76	N/A	N/A	N/A	N/A	N/A	N/A	N/A	N/A	1	No	N/A	N/A	N/A	Yes
T6	CopperNickle	C355	134	R3	C355-R3	Yes	0	N/A	N/A	N/A	N/A	N/A	N/A	N/A	N/A	N/A	N/A	N/A	Yes	N/A	N/A	N/A	Yes
T6	CopperNickle	C355	134	R4	C355-R4	Yes	1	No	61	N/A	N/A	N/A	N/A	N/A	N/A	N/A	N/A	10	No	14	No	2.353	No
T6	CopperNickle	C355	134	R5	C355-R5	Yes	1	Yes	63	11	1	17	2	21	3	27	1	35	No	N/A	N/A	N/A	Yes
T6	CopperNickle	C355	134	R6	C355-R6	Yes	0	N/A	N/A	N/A	N/A	N/A	N/A	N/A	N/A	N/A	N/A	N/A	Yes	N/A	N/A	N/A	Yes
T6	CopperNickle	C355	134	R7	C355-R7	Yes	0	N/A	N/A	N/A	N/A	N/A	N/A	N/A	N/A	N/A	N/A	N/A	Yes	N/A	N/A	N/A	Yes
T6	CopperNickle	C376	134	R1	C376-R1	Yes	1	Yes	68	9	4	12	12	20	9	22	1	38	No	11	No	2.273	No
T6	CopperNickle	C376	134	R2	C376-R2	Yes	0	N/A	N/A	N/A	N/A	N/A	N/A	N/A	N/A	N/A	N/A	N/A	Yes	N/A	N/A	N/A	Yes
T6	CopperNickle	C376	134	R3	C376-R3	Yes	1	Yes	45	11	8	14	22	16	22	20	8	39	No	11	Yes	2.412	No
T6	CopperNickle	C376	134	R4	C376-R4	Yes	1	Yes	42	11	10	14	17	17	16	20	12	38	No	11	No	2.454	No
T6	CopperNickle	C376	134	R5	C376-R5	Yes	1	No	43	N/A	N/A	N/A	N/A	N/A	N/A	N/A	N/A	10	No	11	Yes	2.448	No
T6	CopperNickle	C376	134	R6	C376-R6	Yes	1	No	53	13	20	17	20	20	21	N/A	N/A	22	No	14	No	2.29	No
T6	CopperNickle	C376	134	R7	C376-R7	Yes	1	Yes	41	12	2	24	20	27	18	30	24	39	No	12	No	2.317	No
T6	Competitive	CC13	N/A	R1	CC13-R1	Yes	1	Yes	38	12	6	15	12	18	16	21	10	49	No	12	Yes	2.37	No
T6	Competitive	CC13	N/A	R2	CC13-R2	Yes	1	Yes	48	10	5	12	21	15	23	19	15	39	No	10	Yes	2.512	No
T6	Competitive	CC13	N/A	R3	CC13-R3	Yes	1	Yes	48	9	6	12	8	15	6	18	21	40	No	10	Yes	2.419	No
T6	Competitive	CC13	N/A	R4	CC13-R4	Yes	1	Yes	44	10	16	14	23	17	19	20	19	40	No	10	Yes	2.536	No
T6	Competitive	CC13	N/A	R5	CC13-R5	Yes	1	Yes	37	13	5	16	10	19	18	22	16	47	No	13	Yes	2.277	No
T6	Competitive	CC13	N/A	R6	CC13-R6	Yes	0	N/A	N/A	N/A	N/A	N/A	N/A	N/A	N/A	N/A	N/A	N/A	Yes	N/A	N/A	N/A	Yes
T6	Competitive	CC13	N/A	R7	CC13-R7	Yes	1	Yes	37	13	6	16	9	19	15	22	11	50	No	13	Yes	2.348	No
